# Supplementary material for: Serum and Hepatic Autofluorescence as a Real-Time Diagnostic Tool for Early Cholestasis Assessment
Source: MDPI journal article supplement (doi:10.3390/ijms19092634), 2018-09-05
Supplement: s1 [file s1]

## Supplementary Materials

### Serum and Hepatic Autofluorescence as a Real-Time Diagnostic Tool for Early Cholestasis Assessment

Anna C. Croce <sup>1</sup>, Giovanni Bottiroli <sup>1</sup>, Laura Giuseppina Di Pasqua <sup>2</sup>, Clarissa Berardo <sup>2</sup>, Veronica Siciliano <sup>2</sup>, Vittoria Rizzo <sup>3</sup>, Mariapia Vairetti <sup>2</sup>, Andrea Ferrigno <sup>2,\*</sup>

<sup>1</sup> Institute of Molecular Genetics, Italian National Research Council (CNR), Via Abbiategrosso 207, and Department of Biology & Biotechnology, University of Pavia, Via Ferrata 9, I-27100 Pavia, Italy, croce@igm.cnr.it (A.C.C.); bottiroli@igm.cnr.it (G.B.)

<sup>2</sup> Department of Internal Medicine and Therapeutics, University of Pavia, Via Ferrata 9, I-27100 Pavia, Italy; lauragiuseppin.dipasqua01@universitadipavia.it (L.G.D.P.); clarissa.berardo01@universitadipavia.it (C.B.); veronica.siciliano01@universitadipavia.it (V.S.); mariapia.vairetti@unipv.it (M.V.), andrea.ferrigno@unipv.it (A.F.)

<sup>2,3</sup> Department of Molecular Medicine, IRCCS San Matteo, University of Pavia, Viale Golgi 5, I-27100 Pavia, Italy, v.rizzo@smatteo.pv.it (V.R.)

\* Correspondence: andrea.ferrigno@unipv.it; Tel.: +39-0382-986-451

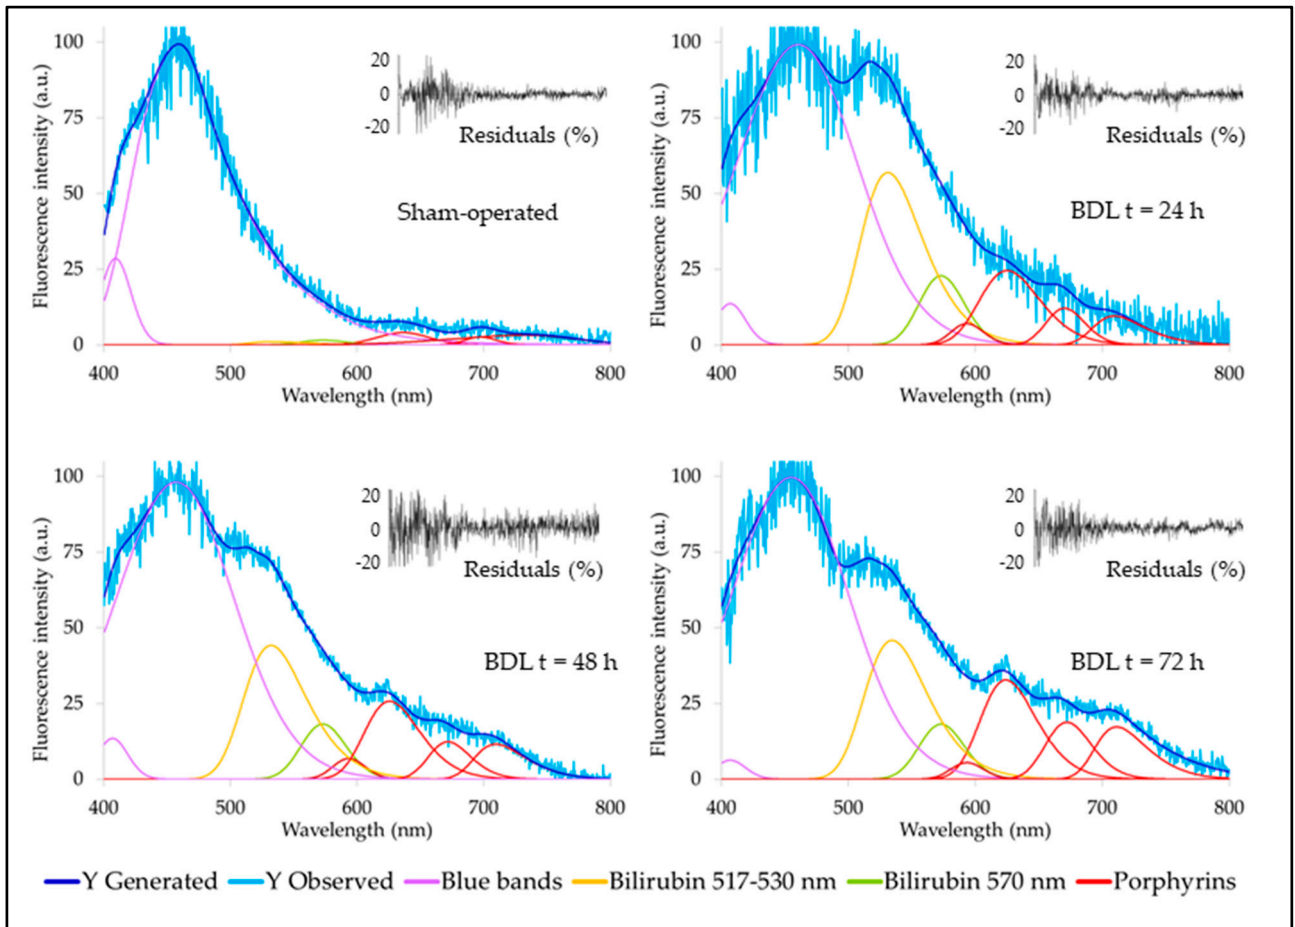

**Figure S1.** Examples of curve fitting analysis of the serum AF spectra from sham-operated or BDL rats. Fitting analysis is based on GMG functions, defined by the PeakFit program in terms of peak center wavelength ( $\lambda$ ) and full width at half maximum (FWHM) parameters to match specifically with two bands ascribable to bilirubin ( $\lambda = 517\text{--}530$  nm, FWHM 53 nm;  $\lambda = 570$  nm, FWHM = 45 nm, [17]), three bands ascribable to porphyrins ( $\lambda \approx 625$  nm, FWHM  $\approx 55$  nm;  $\lambda \approx 665$  nm, FWHM  $\approx 40$  nm,  $\lambda \approx 710$  nm, FWHM  $\approx 50$  nm, [18]), to the main band in the blue region ( $\lambda \approx 455\text{--}460$  nm, FWHM  $\approx 105$  nm), or to additional minor bands ( $\lambda \approx 405\text{--}410$  nm;  $\lambda \approx 590\text{--}600$  nm), allowed to adapt freely so as to obtain a satisfying combination. The goodness of fitting was verified by residual analysis (insets) and coefficient of determination ( $r^2 \geq 0.897$ ).

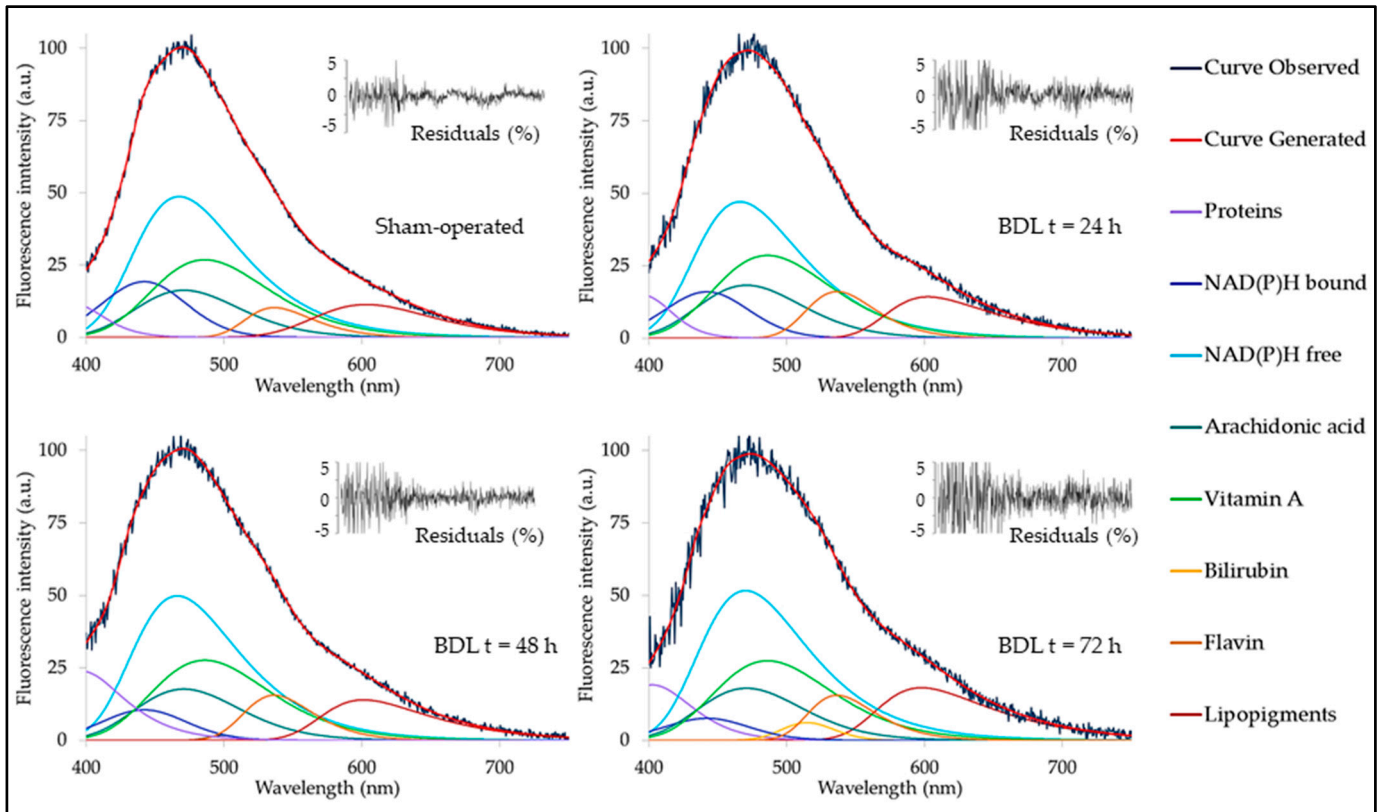

**Figure S2.** Examples of curve fitting analysis of the liver AF spectra from sham-operated or BDL rats. Fitting analysis is based on GMG functions, defined by the PeakFit program in terms of peak center wavelength ( $\lambda$ ) and full width at half maximum (FWHM) parameters typical of each fluorophore in previous experiments [48]: NAD(P)H free ( $\lambda = 463$  nm; FWHM = 115 nm) and bound ( $\lambda = 444$  nm; FWHM = 105 nm), flavins ( $\lambda = 526$  nm; FWHM = 81 nm), vitamin A ( $\lambda = 488$  nm; FWHM = 102 nm), arachidonic acid (fatty acids,  $\lambda = 470$  nm; FWHM = 90 nm), proteins (emission tail,  $\lambda < 440$  nm) and lipofuscin-like lipopigments  $\lambda = 587$  nm; FWHM = 80 nm). The GMG functions relating to proteins and lipofuscin-like lipopigments were allowed to adapt freely so as to obtain a satisfying combination because of the variability of the emission of these components in accordance with their heterogeneous chemical composition, oxidation, and crosslink degrees. The goodness of fitting was verified by residual analysis (insets) and coefficient of determination ( $r^2 \geq 0.934$ ).
